# Supplementary material
Source: PubMed Central journal article supplement (PMC4347253)
Supplement: JCI74428sd.pdf [file JCI74428sd.pdf]

Supplementary Data

Supplementary Figures

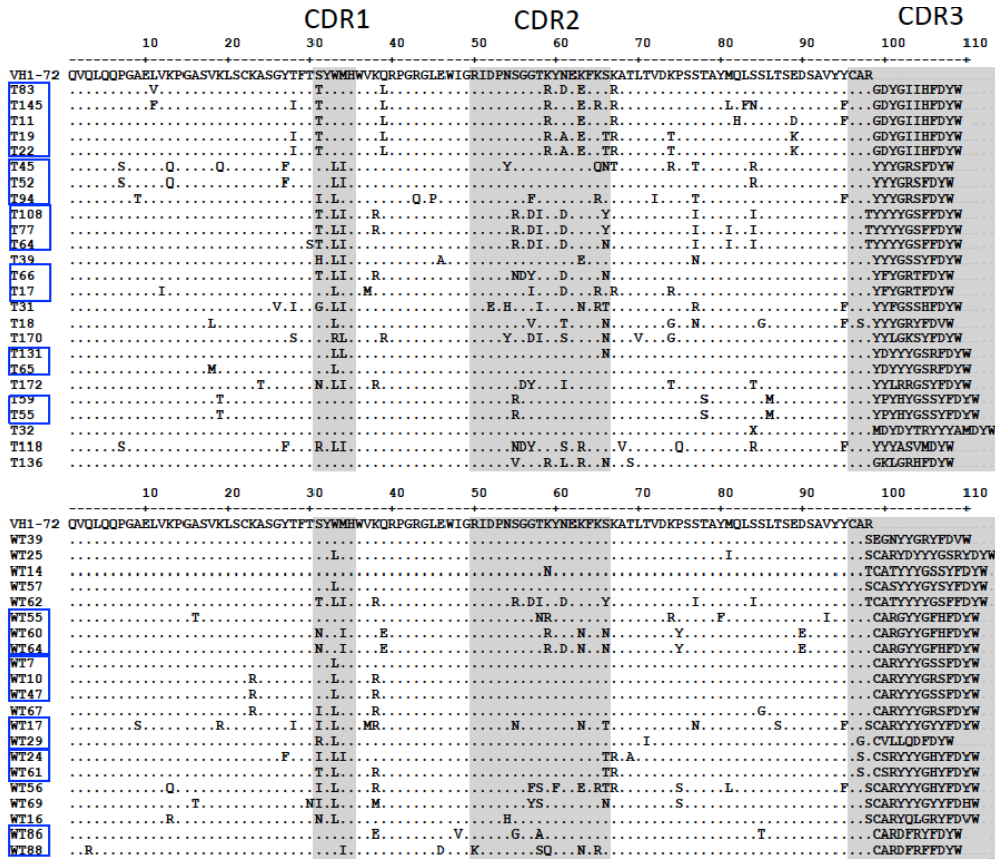

Figure 1A

**Figure 1A: Localization of amino acid substitutions in distinct clones encoding VH1-72 heavy chains of anti-NP monoclonal antibodies obtained from wild type and TACI-deficient mice.** Shown are independent VH sequences compared to the germline VH1-72 (indicated above each group). The boxed sequences correspond to the same clone, defined by the V(D)J junction. CDR1, CDR2 and CDR3, defined according to Kabat are shadowed. Sequences shown are all IgG1.

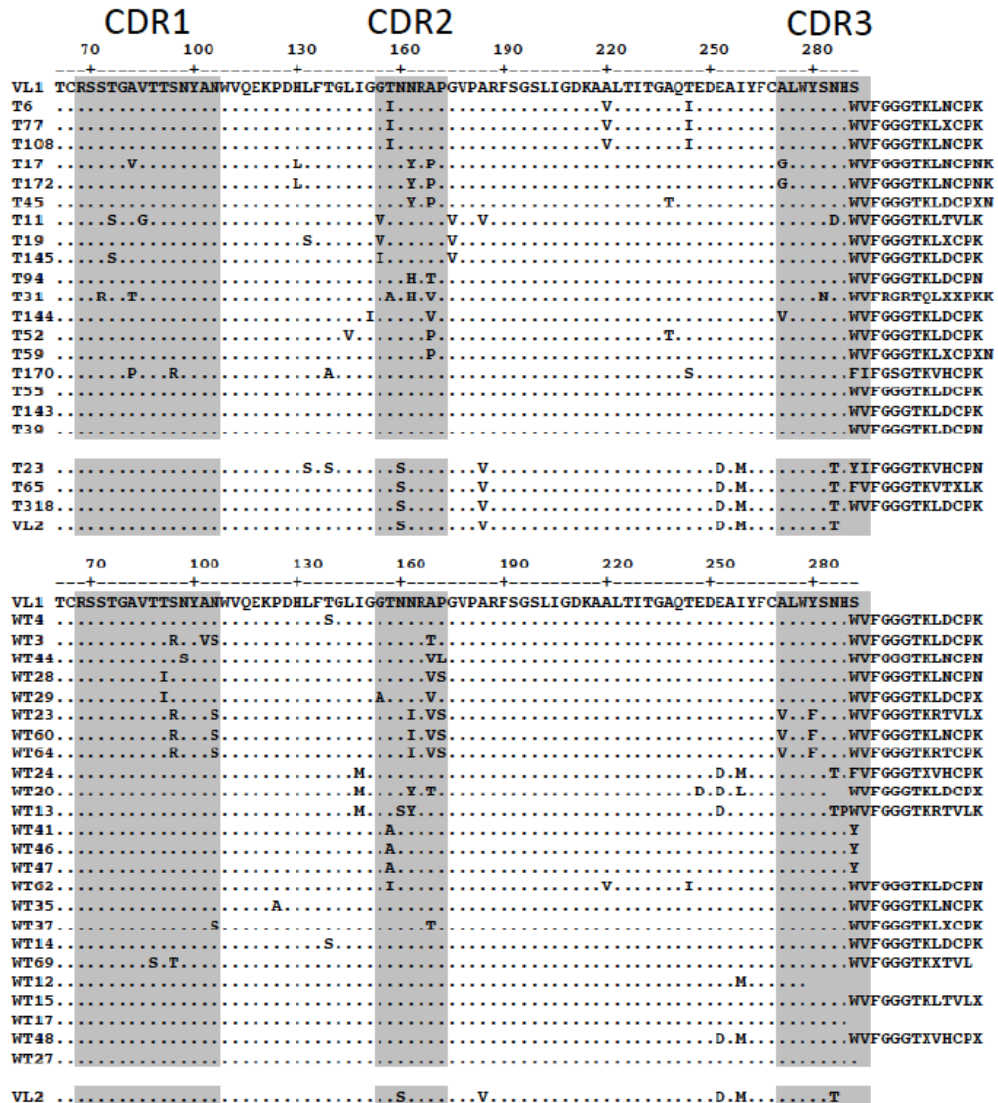

**Figure 1B**

**Figure 1B: Localization of amino acid substitutions in distinct clones encoding Ig light chains of anti-NP monoclonal antibodies obtained from wild type and TACI-deficient mice.** Shown are independent VL (V $\lambda$ 1 or V $\lambda$ 2) sequences compared to the germline (indicated above and below each group). CDR1, CDR2 and CDR3, defined according to Kabat are shadowed. The VL frequency of mutations was the same (1.7%) in clones derived from wt or from TACI-deficient mice.

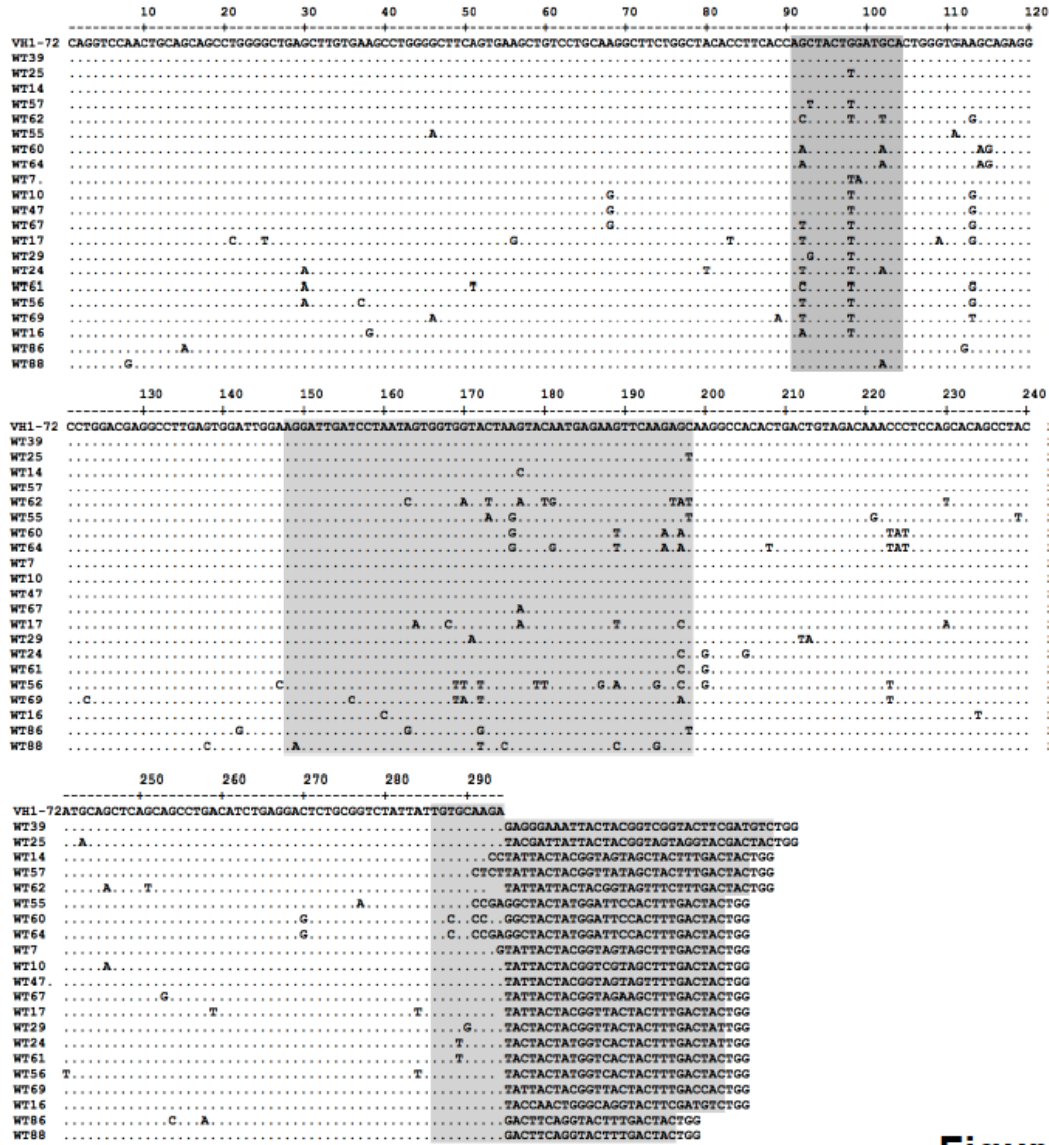

Figure 1C

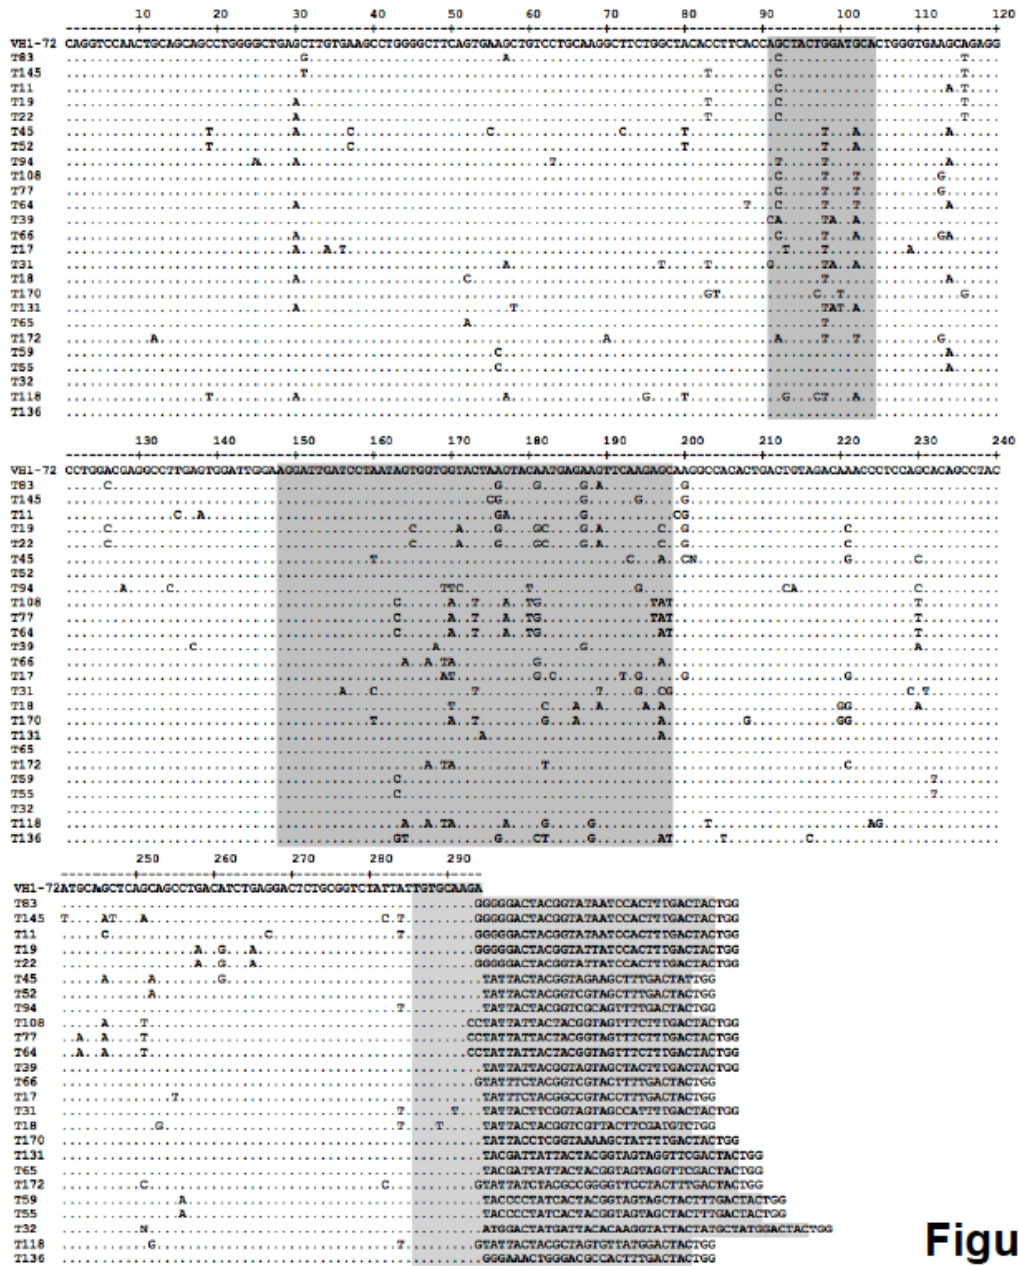

**Figure 1D**

**Figures 1C and 1D: Nucleotide sequences of VH1-72 heavy chains of anti-NP monoclonal antibodies obtained from wild type and TAC1-deficient mice. Shown are independent VH sequences compared to the germline VH1-72 (indicated above each group, 1C, TAC1-ko, 1D, wt). CDR1, CDR2 and CDR3, defined according to Kabat are shadowed. Sequences shown correspond to the amino acid sequences shown in figure 1A.**

|      |                                                                                                                        |        |        |        |           |         |        |        |           |        |           |           |                          |                          |
|------|------------------------------------------------------------------------------------------------------------------------|--------|--------|--------|-----------|---------|--------|--------|-----------|--------|-----------|-----------|--------------------------|--------------------------|
|      | 10                                                                                                                     | 20     | 30     | 40     | 50        | 60      | 70     | 80     | 90        | 100    | 110       | 120       |                          |                          |
| VL1  | ACTTGTGGCTCAAGTACTGGGGCTGTACAACTAGTAACTATGCCCACTGGGTCCAAGAAAACCAGATCATTTTTCACCTGGTCTAATAGGTGGTACCAACAACCGAGCTCCAGTGTPT |        |        |        |           |         |        |        |           |        |           |           |                          |                          |
| WT4  | .....                                                                                                                  |        |        |        |           |         |        |        | G.....    |        |           |           |                          |                          |
| WT3  | .....                                                                                                                  |        |        | A..... | T..G..... |         |        |        |           |        |           | A.....    |                          |                          |
| WT44 | .....                                                                                                                  | A..... |        | G..... |           |         |        |        |           |        |           | T..T..... |                          |                          |
| WT28 | .....                                                                                                                  |        | T..... |        |           |         |        |        |           |        |           | T..T..... |                          |                          |
| WT29 | .....                                                                                                                  |        | T..... |        |           |         |        |        |           | C..... |           | T.....    |                          |                          |
| WT23 | .....                                                                                                                  |        | C..... |        | G.....    |         |        |        |           |        | T.....    | T..T..... |                          |                          |
| WT60 | .....                                                                                                                  |        | C..... |        | G.....    |         |        |        |           |        | T.....    | T..T..... |                          |                          |
| WT64 | .....                                                                                                                  |        | C..... |        | G.....    |         |        |        |           |        | T.....    | T..T..... |                          |                          |
| WT24 | .....                                                                                                                  |        |        |        |           |         |        |        | G.....    |        |           | T.....    |                          |                          |
| WT20 | .....                                                                                                                  |        |        |        |           |         |        |        | G.....    |        | T.....    | A.....    |                          |                          |
| WT10 | .....                                                                                                                  |        |        |        |           |         | G..... |        | G.....    |        | G..T..... |           |                          |                          |
| WT41 | .....                                                                                                                  |        |        |        |           |         |        |        |           |        | G.....    |           |                          |                          |
| WT46 | .....                                                                                                                  |        |        |        |           |         |        |        |           |        | G.....    |           |                          |                          |
| WT47 | .....                                                                                                                  |        |        |        |           |         |        |        |           |        | G.....    |           |                          |                          |
| WT62 | .....                                                                                                                  |        |        |        |           |         |        |        | T.....    |        | T.....    |           |                          |                          |
| WT35 | .....                                                                                                                  |        |        |        |           | G.....  |        |        |           |        |           |           |                          |                          |
| WT37 | .....                                                                                                                  |        |        | G..... |           |         |        |        |           |        |           | A.....    |                          |                          |
| WT14 | .....                                                                                                                  |        |        |        |           |         | G..... |        |           |        |           |           |                          |                          |
| WT09 | .....                                                                                                                  |        | T..... | C..... |           |         |        |        |           |        |           |           |                          |                          |
| WT12 | .....                                                                                                                  |        |        |        |           |         |        |        |           |        |           |           |                          |                          |
| WT15 | .....                                                                                                                  |        |        |        |           |         |        |        |           |        |           |           |                          |                          |
| WT17 | .....                                                                                                                  |        |        |        |           |         |        |        |           |        |           |           |                          |                          |
| WT40 | .....                                                                                                                  |        |        |        |           |         |        |        |           |        |           |           |                          |                          |
| WT27 | .....                                                                                                                  |        |        |        |           |         |        |        |           |        |           |           |                          |                          |
| VL2  | .....                                                                                                                  |        |        |        | T.....    |         |        |        |           |        | G.....    |           |                          |                          |
|      | 130                                                                                                                    | 140    | 150    | 160    | 170       | 180     | 190    | 200    | 210       | 220    | 230       |           |                          |                          |
| VL1  | CCCTGCCAGATTCCTCAGGCTCCCTGATTGGAGACAAGGGCTGCCCTCACCATPCACAGGGGCLCAGACTGAGGATGAGGCAATATATTTCTGTGCTCTATGGGTACAGCAACCATTT |        |        |        |           |         |        |        |           |        |           |           |                          |                          |
| WT4  | .....                                                                                                                  |        |        |        |           |         |        |        |           |        |           | C.....    | GGGTGTTCCGGTGGAGGAACCAAA |                          |
| WT3  | .....                                                                                                                  |        |        |        |           |         |        |        |           |        | T.....    | C.....    | GGGTGTTCCGGTGGAGGAACCAAA |                          |
| WT44 | .....                                                                                                                  |        |        |        |           |         |        |        |           |        |           | C.....    | GGGTGTTCCGGTGGAGGAACCAAA |                          |
| WT28 | .....                                                                                                                  |        |        |        |           |         |        |        |           |        |           |           | GGGTGTTCCGGTGGAGGAACCAAA |                          |
| WT29 | .....                                                                                                                  |        | T..... |        |           |         |        |        |           |        |           |           | GGGTGTTCCGGTGGAGGAACCAAA |                          |
| WT23 | .....                                                                                                                  |        |        |        |           |         |        |        |           |        | T.....    | T.....    | GGGTGTTCCGGTGGAGGAACCAAA |                          |
| WT60 | .....                                                                                                                  |        |        |        |           |         |        |        |           |        | T.....    | T.....    | GGGTGTTCCGGTGGAGGAACCAAA |                          |
| WT64 | .....                                                                                                                  |        |        |        |           |         |        |        |           |        | T.....    | T.....    | GGGTGTTCCGGTGGAGGAACCAAA |                          |
| WT24 | .....                                                                                                                  |        |        |        |           |         |        |        |           |        |           | C.....    | TTCTTTCCGGTGGAGGAACCAAA  |                          |
| WT20 | .....                                                                                                                  |        |        |        |           | C.....  |        | T..... | T..G..... |        |           | C.....    | GGGTGTTCCGGTGGAGGAACCAAA |                          |
| WT13 | .....                                                                                                                  |        |        |        |           |         |        | T..... | G.....    |        |           | C..C..... | GGGTGTTCCGGTGGAGGAACCAAA |                          |
| WT41 | .....                                                                                                                  |        |        |        |           |         |        |        |           |        |           |           |                          |                          |
| WT46 | .....                                                                                                                  |        |        |        |           |         |        |        |           |        |           |           |                          |                          |
| WT47 | .....                                                                                                                  |        |        |        |           |         |        |        |           |        |           |           |                          |                          |
| WT62 | .....                                                                                                                  |        |        |        |           | TG..... |        |        |           |        |           |           | C.....                   | GGGTGTTCCGGTGGAGGAACCAAA |
| WT35 | .....                                                                                                                  |        |        |        |           |         |        |        |           |        |           |           | C.....                   | GGGTGTTCCGGTGGAGGAACCAAA |
| WT37 | .....                                                                                                                  |        |        |        |           |         |        |        |           |        |           |           | C.....                   | GGGTGTTCCGGTGGAGGAACCAAA |
| WT14 | .....                                                                                                                  |        |        |        |           |         |        |        |           |        |           |           | C.....                   | GGGTGTTCCGGTGGAGGAACCAAA |
| WT60 | .....                                                                                                                  |        |        |        |           |         |        |        |           |        |           |           | C.....                   | GGGTGTTCCGGTGGAGGAACCAAA |
| WT12 | .....                                                                                                                  |        |        |        |           |         |        |        | G.....    |        |           |           |                          |                          |
| WT15 | .....                                                                                                                  |        |        |        |           |         |        |        |           | G..... |           |           |                          |                          |
| WT17 | .....                                                                                                                  |        |        |        |           |         |        |        |           |        |           | T..G..... |                          |                          |
| WT48 | .....                                                                                                                  |        |        |        |           |         |        |        |           |        |           |           | T..G.....                | GG                       |
| WT27 | .....                                                                                                                  |        |        |        |           |         |        |        |           |        |           |           |                          | G                        |
| VL2  | .....                                                                                                                  | T..... |        |        |           |         |        |        |           |        |           |           | C.....                   |                          |

Figure 1E



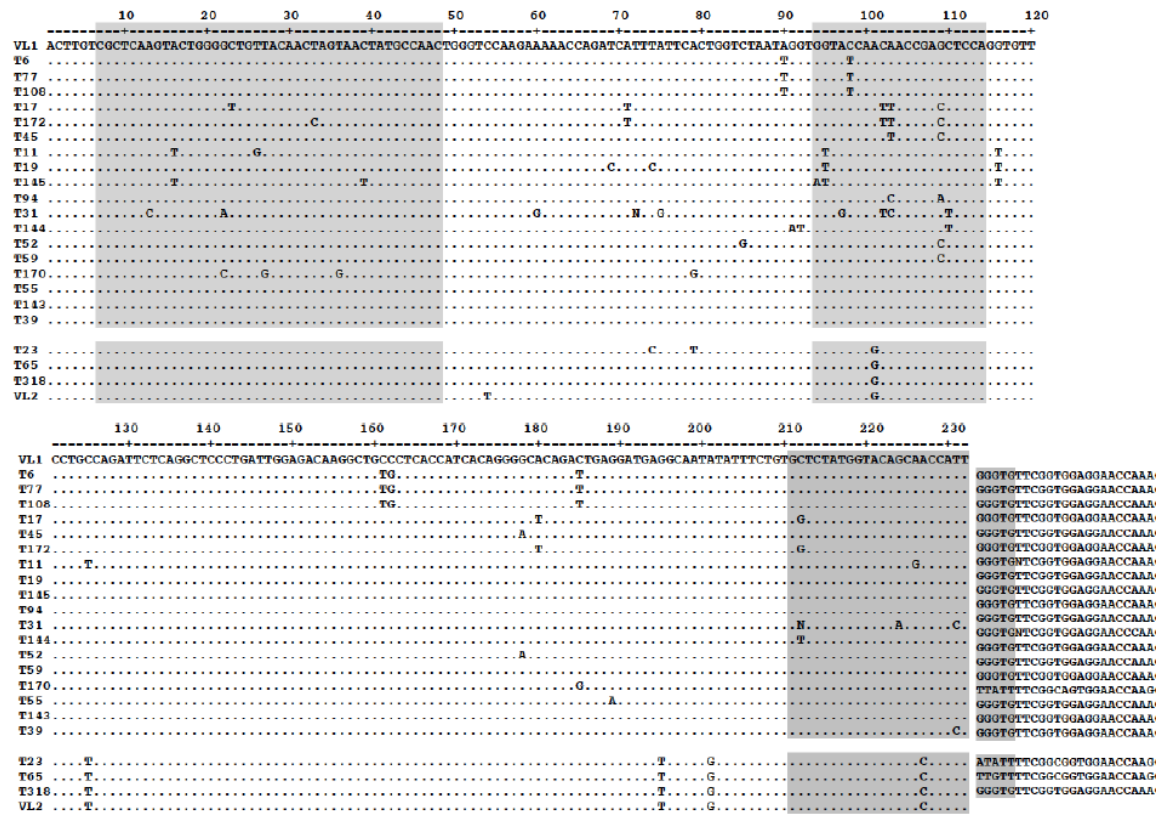

**Figure 1F**

**Figures 1E and 1F: Nucleotide sequences of Light chains of anti-NP monoclonal antibodies obtained from wild type and TACI-deficient mice.** The VL sequences compared to the germline V (indicated above each group, 1E, TACI-ko, 1F, wt). CDR1, CDR2 and CDR3, defined according to Kabat are shadowed. Sequences shown correspond to the aminoacid sequences shown in figure 1B.

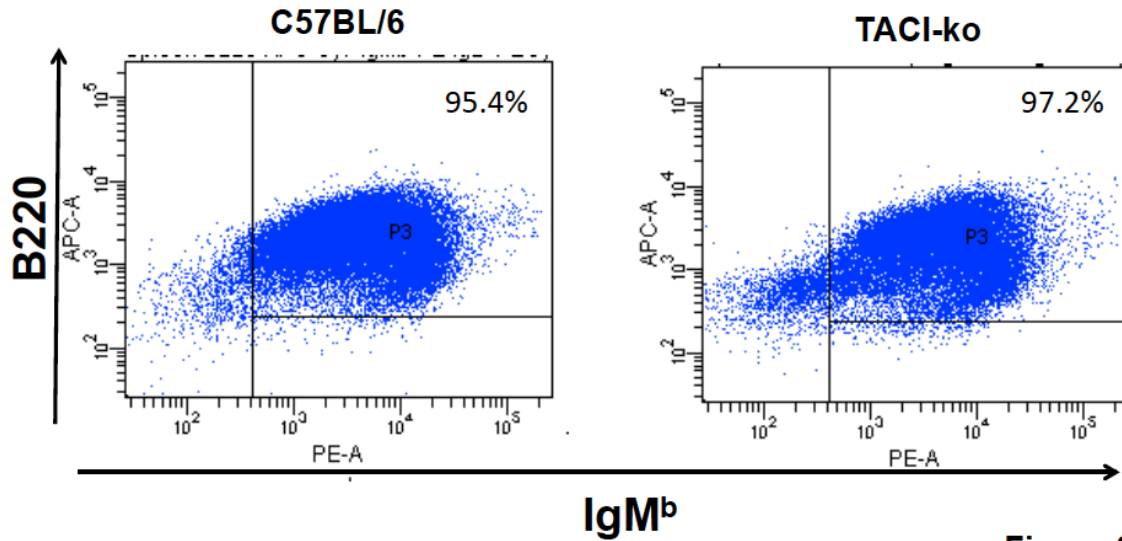

**Figure 2**

**Figure 2: Flow Cytometer analysis of splenocytes obtained from wild type or TACI-deficient mice 10 days after re-infection with *C. rodentium*.** Y-axis depicts staining with anti-B220 antibody; the X-axis depicts staining with anti-IgM<sup>b</sup> antibody. Since IgM<sup>b</sup> is the IgM allotype expressed by B cells of C57BL/6 mice, the figure indicates that B cells express the C57BL/6 IgM allotype.

**Germinal center B cell clones from *C. rodentium* infected mice**

| <b>C57BL/6</b> |                      |         |                   | <b>TACI-ko</b> |                      |         |                     |
|----------------|----------------------|---------|-------------------|----------------|----------------------|---------|---------------------|
| Clone          | IgH chain            | Strain  | Junction          | Clone          | IgH chain            | Strain  | Junction            |
| BL6_E08        | Musmus IGHV1-18*01 F | C57BL/6 | CARITYNSREFFYW    | CI_D09         | Musmus IGHV1-19*01 F | C57BL/6 | CALGSSSFDFYW        |
| BL6_H07        | Musmus IGHV1-18*01 F | C57BL/6 | CARWRNGYFDVW      | CI_E02         | Musmus IGHV1-19*01 F | C57BL/6 | CARSFAYW            |
| BL6_C02        | Musmus IGHV1-31*01 F | C57BL/6 | CARSITTAPFDYW     | CI_A09         | Musmus IGHV1-19*01 F | C57BL/6 | CARDSSGYAYW         |
| BL6_C07        | Musmus IGHV1-54*01 F | C57BL/6 | CARSMITKAMDYW     | CI_D01         | Musmus IGHV1-19*01 F | C57BL/6 | CATPDGYYGYFDVW      |
| BL6_D03        | Musmus IGHV1-64*01 F | C57BL/6 | CARRGLYGSSPYFDYW  | CI_C01         | Musmus IGHV1-20*01 F | C57BL/6 | CARTGTTFDYW         |
| BL6_F03        | Musmus IGHV1-7*01 F  | C57BL/6 | CARGDGYPPYYAMDYW  | CI_D04         | Musmus IGHV1-39*01 F | C57BL/6 | CARTLYYFDYW         |
| BL6_G01        | Musmus IGHV1-7*01 F  | C57BL/6 | CARGYYYGSSYGYFDVW | CI_H02         | Musmus IGHV1-50*01 F | C57BL/6 | CARYDGLGYFDYW       |
| BL6_H09        | Musmus IGHV1-72*01 F | C57BL/6 | CTRGFYDGFSSWFAYW  | CI_H12         | Musmus IGHV1-52*01 F | C57BL/6 | CARWGLRRSYAMDYW     |
| BL6_E02        | Musmus IGHV1-81*01 F | C57BL/6 | CARVYYAMDYW       | CI_C12         | Musmus IGHV1-52*01 F | C57BL/6 | CARFHYWYFDVW        |
| BL6_E06        | Musmus IGHV1-81*01 F | C57BL/6 | CAREDGSSSWFAYW    | CI_E11         | Musmus IGHV1-53*01 F | C57BL/6 | CARGGVITTVARYWYFDVW |
| BL6_A06        | Musmus IGHV1-81*01 F | C57BL/6 | CAREGDYSFAYW      | CI_H10         | Musmus IGHV1-53*01 F | C57BL/6 | CARTAQTWGVFDYW      |
| BL6_B02        | Musmus IGHV1-81*01 F | C57BL/6 | CARWTAQATCYW      | CI_F03         | Musmus IGHV1-64*01 F | C57BL/6 | CARGYSIYWFVW        |
| BL6_G11        | Musmus IGHV1-81*01 F | C57BL/6 | CARDSAGQAWFAYW    | CI_F11         | Musmus IGHV1-64*01 F | C57BL/6 | CARKGLYRNYGVAYW     |
| BL6_H08        | Musmus IGHV1-82*01 F | C57BL/6 | CARSGSSYYYAMDYW   | CI_E04         | Musmus IGHV1-64*01 F | C57BL/6 | CARRWLLRSDYW        |
| BL6_H02        | Musmus IGHV1-82*01 F | C57BL/6 | CARSIIYGIYAMDYW   | CI_B02         | Musmus IGHV1-69*01 F | C57BL/6 | CARWYDFDYW          |
| BL6_B09        | Musmus IGHV1-9*01    | C57BL/6 | CARCSNLYYFDYW     | CI_C10         | Musmus IGHV1-72*01 F | C57BL/6 | CVRWGYFDVW          |
| BL6_F09        | Musmus IGHV1-9*01 F  | C57BL/6 | CARGSNLYYFDYW     | CI_E05         | Musmus IGHV1-80*01 F | C57BL/6 | CARFLTTVVATDYAMDYW  |
| BL6_D09        | Musmus IGHV1-9*01 F  | C57BL/6 | CARSTFDYW         | CI_A06         | Musmus IGHV1-81*01 F | C57BL/6 | CTLDVPFAYW          |
| BL6_E12        | Musmus IGHV1-9*01 F  | C57BL/6 | CARRGGAYW         | CI_D06         | Musmus IGHV1-81*01 F | C57BL/6 | CARYYYGSSFFDYW      |
| BL6_C09        | Musmus IGHV10-1*01 F | C57BL/6 | CVRPSLYDGYLGGFAYW | CI_D02         | Musmus IGHV1-85*01 F | C57BL/6 | CARGGIYGITGAMDYW    |
| BL6_G09        | Musmus IGHV10-3*02 F | C57BL/6 | CVRHYGSYYAMDYW    | CI_G12         | Musmus IGHV1-85*01 F | C57BL/6 | CXXXGIXGIXGAXXX     |
| BL6_B01        | Musmus IGHV14-2*01 F | C57BL/6 | CALYGDRAWFAYW     | CI_F07         | Musmus IGHV10-3*01 F | C57BL/6 | CVRGNAMDYW          |
| BL6_H11        | Musmus IGHV14-4*01 F | C57BL/6 | CTTSTTVASDYW      | CI_B12         | Musmus IGHV14-2*01 F | C57BL/6 | CARYPEAYW           |
| BL6_G02        | Musmus IGHV3-6*01 F  | C57BL/6 | CARGRSGPFAYW      | CI_D04         | Musmus IGHV14-2*01 F | C57BL/6 | CALEGGFAYW          |
| BL6_H04        | Musmus IGHV5-17*01 F | C57BL/6 | CARSLIFSAYW       | CI_C05         | Musmus IGHV2-2*01 F  | C57BL/6 | CARKGDYYDAMDYW      |
|                |                      |         |                   | TACI_B09       | Musmus IGHV3-6*01 F  | C57BL/6 | CAREGNWEAMDYW       |
|                |                      |         |                   | TACI_H07       | Musmus IGHV3-6*01 F  | C57BL/6 | CAKGAARGFAYW        |
|                |                      |         |                   | TACI_G01       | Musmus IGHV5-17*01 F | C57BL/6 | CAMGGYSAWFAYW       |
|                |                      |         |                   | TACI_G02       | Musmus IGHV5-17*01 F | C57BL/6 | CARNWVDYW           |
|                |                      |         |                   | TACI_B10       | Musmus IGHV5-4*01 F  | C57BL/6 | CARNDRCFYDAXDYXGQ   |
|                |                      |         |                   | TACI_B01       | Musmus IGHV5-6*01 F  | C57BL/6 | CARLAYYSNYGWYFDVW   |

**Figure 3**

**Figure 3: Identification of VH genes and V(D)J junctions of B cell clones isolated from the spleen of mice infected with *C. rodentium* 10 days earlier.** Figure shows that all VH genes isolated match best to C57BL/6 germline alleles. Germinal center B cells (CD19+, GL7+ and Fas+) were isolated by single cell sorting from wt or TACI-deficient mice. CDN, amplification and sequencing were done according to (1).



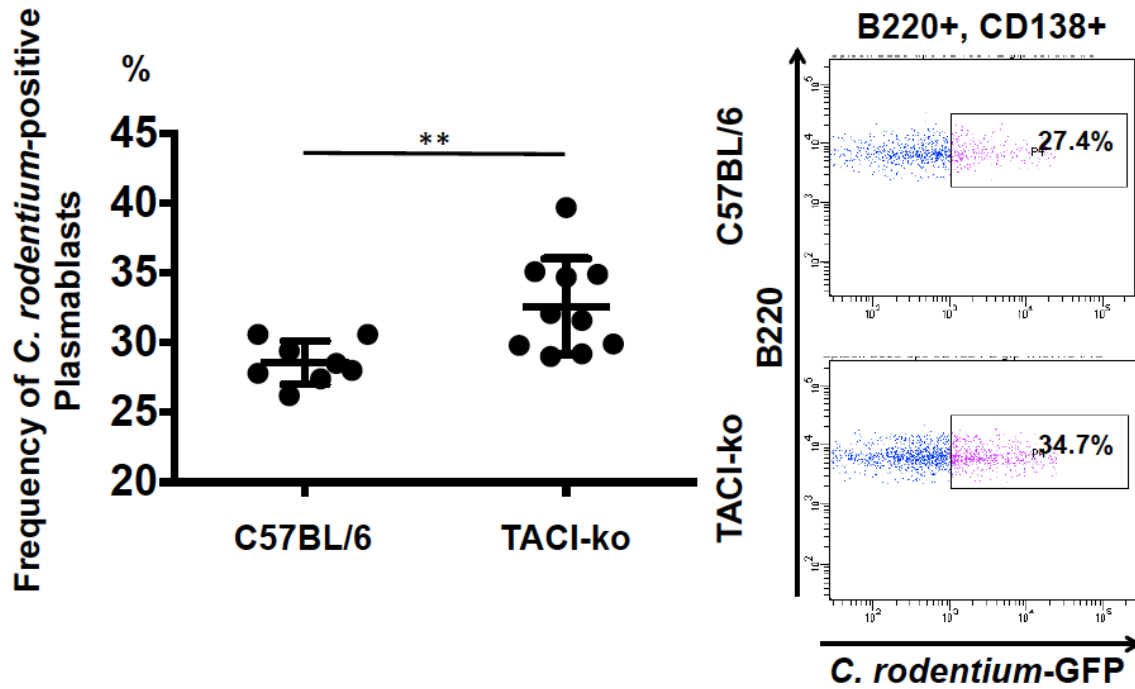

**Figure 4**

**Figure 4: Identification of *C. rodentium* binding B cells.** The figure shows flow cytometry analysis of splenocytes obtained from mice infected twice with *C. rodentium* with a month interval. Cells were analyzed 10 days after second infection. The left panel shows the frequency (Y-axis) of plasmablasts that bind to GFP-expressing *C. rodentium*. Panels on the right show representative dot plots (from N=10/strain) of splenocytes stained with anti-B220 antibody (Y-axis), anti-CD138 antibody and incubated with GFP-expressing *C. rodentium* (X-axis). Cells shown are both B220+ and CD138+ (plasmablasts). Rectangles depict the population that stains positively (above background) with the GFP-labeled *C. rodentium*.

**Supplementary methods:**

Primers for real-time PCR:

CTATTACGTGGATCGCAATGATGA (cIAP1-F),  
TCTCCAGGGCCAAAATGCACCACT (cIAP1-R); CGGGACATCTTGACGGAC  
(BCL6-F), CAGGGCTGATTTTCAGGATCTA (BCL6-R);  
CATTCTGCCCAAAGATCAGT (TACI-F), TGGTGCCTTCCTGAGTTGTCT (TACI-  
R); AGCCCATCACCATCTTCCAGGAG (GAPDH-F),  
CCTCTCGCCACAGCTTTCCA (GAPDH-R)

Primers for sequencing:

Forward Primers:

V1-72 (IMGT) (2, 3)) specific forward primer

(CTTGACCCAGATGTCCCTTCTTCTCCAGCAGG);

Universal forward primers (AGGTSMARCTGCAGSAGTCWGG),

(GGGAATTCGAGGTGCAGCTGCAGGAGTCTGG) and

(SARGTNMAGCTGSAGSAGTC);

Reverse primers:

J4 reverse primer (TTCCTTGACCCCAGTAGTCCA).

Nested PCR:

The nested PCR was done using the same forward primer and one of several reverse primers located on J1-J2 intron (ATGGCCTGACATGGGGAGATCTG), J2-J3 intron

(GGGTCTAG AGGTGTCCCTAGTCCTTCATGACC) or J3-J4 intron (GGGTCTAG AGGTGTCCCTAGTCCTTCATGACC).

Amplification and sequencing of VH and VL exons from single sorted germinal center B cells isolated from mice infected with *C. rodentium* were done according to (1). Primers for amplifying and sequencing  $\lambda 1$  and  $\lambda 2$  light chain exons from hybridomas were according to (1)

#### References:

1. Tiller T, Busse CE, and Wardemann H. Cloning and expression of murine Ig genes from single B cells. *Journal of Immunological Methods*. 2009;350(1-2):183-93.
2. Giudicelli V, Chaume D, and Lefranc MP. IMGT/GENE-DB: a comprehensive database for human and mouse immunoglobulin and T cell receptor genes. *Nucleic Acids Res*. 2005;33(Database issue):D256-61.
3. Alamyar E, Giudicelli V, Li S, Duroux P, and Lefranc MP. IMGT/HighV-QUEST: the IMGT(R) web portal for immunoglobulin (IG) or antibody and T cell receptor (TR) analysis from NGS high throughput and deep sequencing. *Immunome Res*. 2012;8(1):26.
